# Supplementary material for: CSB interacts with BRCA1 in late S/G2 to promote MRN- and CtIP-mediated DNA end resection
Source: PubMed Central journal article supplement — Nucleic Acids Res. 2019 Sep 10;47(20):10678–92. doi: 10.1093/nar/gkz784 (PMC6847465; doi:10.1093/nar/gkz784), 2019-09-10

## SUPPLEMENTARY FIGURE LEGENDS

**Figure S1.** CSB promotes recruitment of the BRCA1-C complex to DSBs. **(A)** Representative images of U2OS-265 WT and CSB-KO cells with induction of FokI expression. Fixed cells were costained with anti-CSB and anti- $\gamma$ H2AX antibodies. Nuclei were stained with DAPI in blue in this and following figures. Scale bars in this and subsequent figures: 5  $\mu$ m. **(B)** Quantification of the intensity of CSB signal at the site of FokI-induced DSBs in U2OS-265 WT and CSB KO cells from **(A)**.  $\gamma$ H2AX staining was used to mark the FokI-induced damage site. Cells positive for  $\gamma$ H2AX were used for analysis of CSB signal intensity. The respective numbers of cells analyzed for WT and CSB KO cells were 103 and 132. Data are represented as a scatter plot graph with the mean indicated. The *P* value was determined using non-parametric Mann-Whitney rank-sum *t*-test. **(C)** Representative IF images of U2OS-265 CSB-KO cells with induction of FokI expression. Fixed cells were stained with an anti- $\gamma$ H2AX antibody in conjunction with antibodies against various endogenous proteins as indicated. **(D)** Quantification of the average intensity of MRE11 signal at the site of FokI-induced DSBs in U2OS-265 WT and CSB KO cells. Standard deviations from three independent experiments are indicated. The *P* value was determined using a Student's two-tailed unpaired *t* test. **(E)** Quantification of cells with  $\geq 10$  IR-induced MRE11 foci. hTERT-RPE WT and CSB-KO cells were treated with 2 Gy IR and fixed 1 h later. Standard deviations from three independent experiments are indicated. **(F)** Quantification of cells with  $\geq 10$  IR-induced NBS1 foci. hTERT-RPE WT and CSB-KO cells were treated with 2 Gy IR and fixed 1 h later. Standard deviations from three independent experiments are indicated.

**Figure S2.** CSB colocalizes with the BRCA1-C complex at the lac operator array. **(A)** Representative images of U2OS-265 CSB-KO cells expressing the vector alone or mCherry-LacR-CSB. Cells were fixed and stained with antibodies against various proteins as indicated. **(B)** Quantification of vector- and mCherry-LacR-CSB-expressing U2OS-265 CSB-KO cells exhibiting RAP80 accumulation at the lac

operator array. At least 100 cells positive for mCherry staining were scored per condition in a blind manner. Standard deviations from three independent experiments are indicated. (C) Quantification of vector-, mCherry-LacR-CSB, mCherry-LacR-CSB-W851R and mCherry-LacR-CSB- $\Delta$ N30-expressing U2OS-265 CSB-KO cells exhibiting BRCA1 accumulation at the lac operator array. Scoring was done as in S2B. Standard deviations from three independent experiments are indicated.

**Figure S3.** Knockdown of BRCA1 does not affect the interaction of CSB with MRN and vice versa. (A) Representative images of mCherry-LacR-CSB-expressing U2OS-265-CSB-KO cells transfected with various siRNAs as indicated. Fixed cells were stained with an anti-BRCA1 antibody. (B) Representative images of mCherry-LacR-CSB-expressing U2OS-265-CSB-KO cells transfected with various siRNAs as indicated. Fixed cells were stained with an anti-NBS1 antibody. (C) Representative images of mCherry-LacR-CSB-expressing U2OS-265-CSB-KO cells transfected with various siRNAs as indicated. Fixed cells were stained with an anti-CtIP antibody. (D) Representative images of mCherry-LacR-CSB-expressing U2OS-265-CSB-KO cells transfected with various siRNAs as indicated. Fixed cells were stained with an anti-MRE11 antibody.

**Figure S4.** CSB interacts with MRN and BRCA1 through two distinct regions, with the former requiring the WHD. (A) Representative images of U2OS-265-CSB-KO cells expressing mCherry-LacR-MRE11 in conjunction with various Myc-CSB alleles as indicated. (B & C) Representative images of U2OS-265-CSB-KO cells expressing mCherry-LacR-BRCA1 in conjunction with various Myc-CSB alleles as indicated.

**Figure S5.** CSB phosphorylation on S1276 mediates its interaction with the BRCT domain of BRCA1. (A) Representative images of U2OS-265-CSB-KO cells expressing mCherry-LacR-CSB in conjunction with various GFP-BRCA1 alleles as indicated. (B) Representative images of U2OS-265-CSB-KO cells

expressing mCherry-LacR-CSB in conjunction with various Flag-BRCA1 alleles as indicated. **(C)** Quantification of percentage of cells with various Flag-BRCA1 alleles at the lac operator array. At least 250 cells positive for expression of Flag-tagged BRCA1 alleles were scored per condition in a blind manner. Standard deviations from three independent experiments are indicated. **(D)** Representative images of U2OS-265-CSB-KO cells expressing various mCherry-LacR-CSB alleles as indicated. **(E)** Representative images of U2OS-265-CSB-KO cells expressing GFP-BRCA1-BRCT in conjunction with various mCherry-LacR-CSB alleles as indicated.

**Figure S6.** CSB phosphorylation on S1276 promotes efficient recruitment of the BRCA1-C complex to FokI-induced DSBs. **(A-D)** Representative images of U2OS-265 CSB-KO cells with induction of FokI expression. Fixed cells were stained with anti- $\gamma$ H2AX antibody in conjunction with anti-BRCA1 (A), anti-MRE11 (B), anti-CtIP (C) or anti-RIF1 (D).

**Figure S7.** Loss of CSB does not affect AsiSI-induced cleavage. **(A)** Schematic diagram of AsiSI-induced DSB1 and DSB 2 on chromosome 1. The position of three different pairs of primers flanking DSB1 and DSB2 are indicated. **(B)** Western analysis of AID-DIV-A-U2OS WT, CSB-KO-1 and CSB-KO-2. Immunoblotting was done with anti-CSB and anti- $\gamma$ -tubulin antibodies. **(C)** Quantification of DNA cleavage at AsiSI-induced DSB1 on chromosome 1 in AID-DIV-A-U2OS WT, CSB-KO clone 1 (KO-1) and CSB-KO clone 2 (KO-2). Standard deviations from three independent experiments are indicated. **(D)** Quantification of DNA cleavage at AsiSI-induced DSB2 on chromosome 1 in AID-DIV-A-U2OS WT, CSB-KO clone 1 (KO-1) and CSB-KO clone 2 (KO-2). Standard deviations from three independent experiments are indicated.

**Figure S8.** Loss of CSB impairs the amount of ssDNA generated from DSBs. **(A)** Quantification of the amount of ssDNA. AID-DIV-A-U2OS WT, CSB-KO-1 and CSB-KO-2 were treated with no 4-OHT or 4-

OHT for 1 h , 2 h or 4 h. The amount of ssDNA generated at three different positions 335 nt, 1618 nt or 3500 nt from of AsiSI-induced DSB1 was measured as described in “Methods”. Standard deviations from three indepenent experiments are indicated. \* $P<0.05$ ; \*\* $P<0.01$ ; \*\*\* $P<0.001$ . n.s.,  $P>0.05$ . **(B)** Quantification of the amount of ssDNA. AID-DIV-A-U2OS WT, CSB-KO-1 and CSB-KO-2 were treated with no 4-OHT or 4-OHT for 1 h , 2 h or 4 h. The amount of ssDNA generated at three different positions 364 nt, 1754 nt or 3564 nt from of AsiSI-induced DSB2 was measured as described in “Methods”. Standard deviations from three indepenent experiments are indicated. \* $P<0.05$ ; \*\* $P<0.01$ ; \*\*\* $P<0.001$ . **(C)** Quantification of the amount of ssDNA. AID-DIV-A-U2OS WT, CSB-KO-1 and CSB-KO-2 were treated with no 4-OHT or 4-OHT for 1 h , 2 h or 4 h. The amount of ssDNA generated at a location containing no AsiSI restriction site on chromosome 22 was measured as described in “Methods”. Standard deviations from three indepenent experiments are indicated.

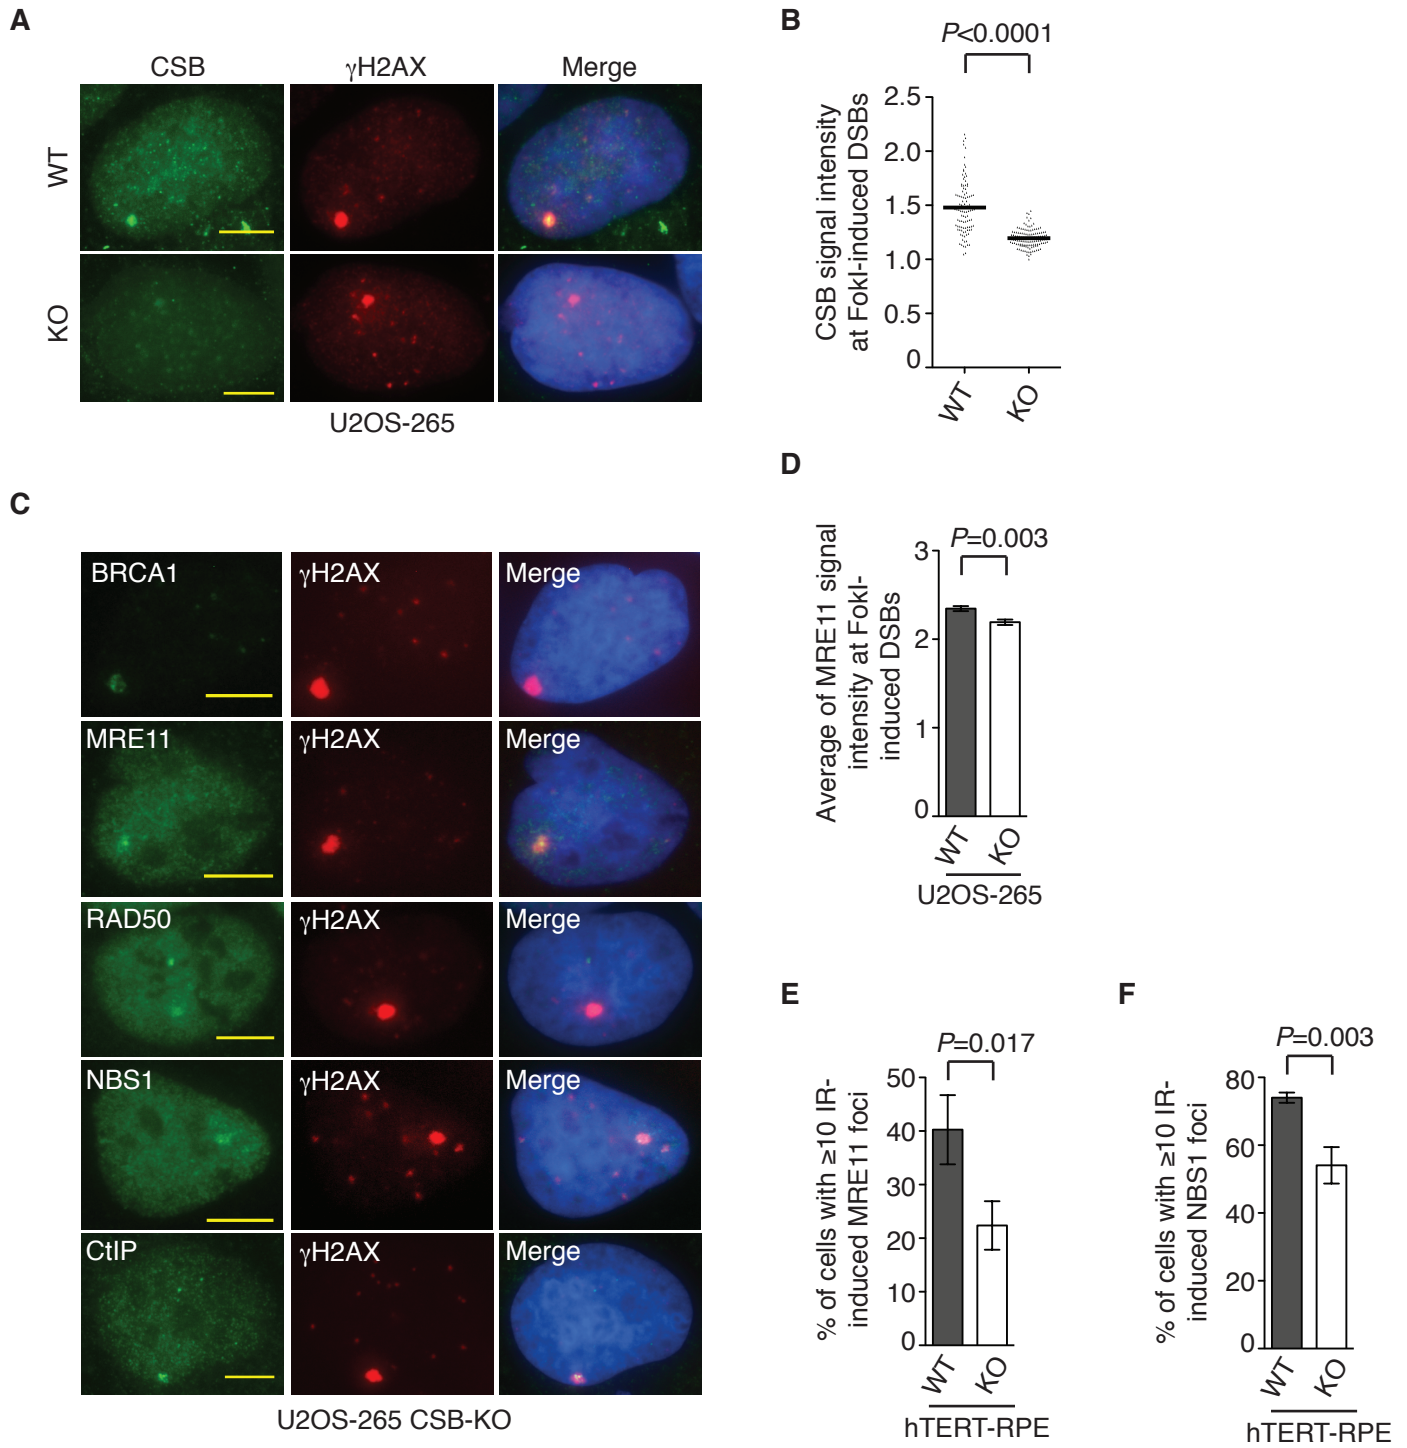

**A**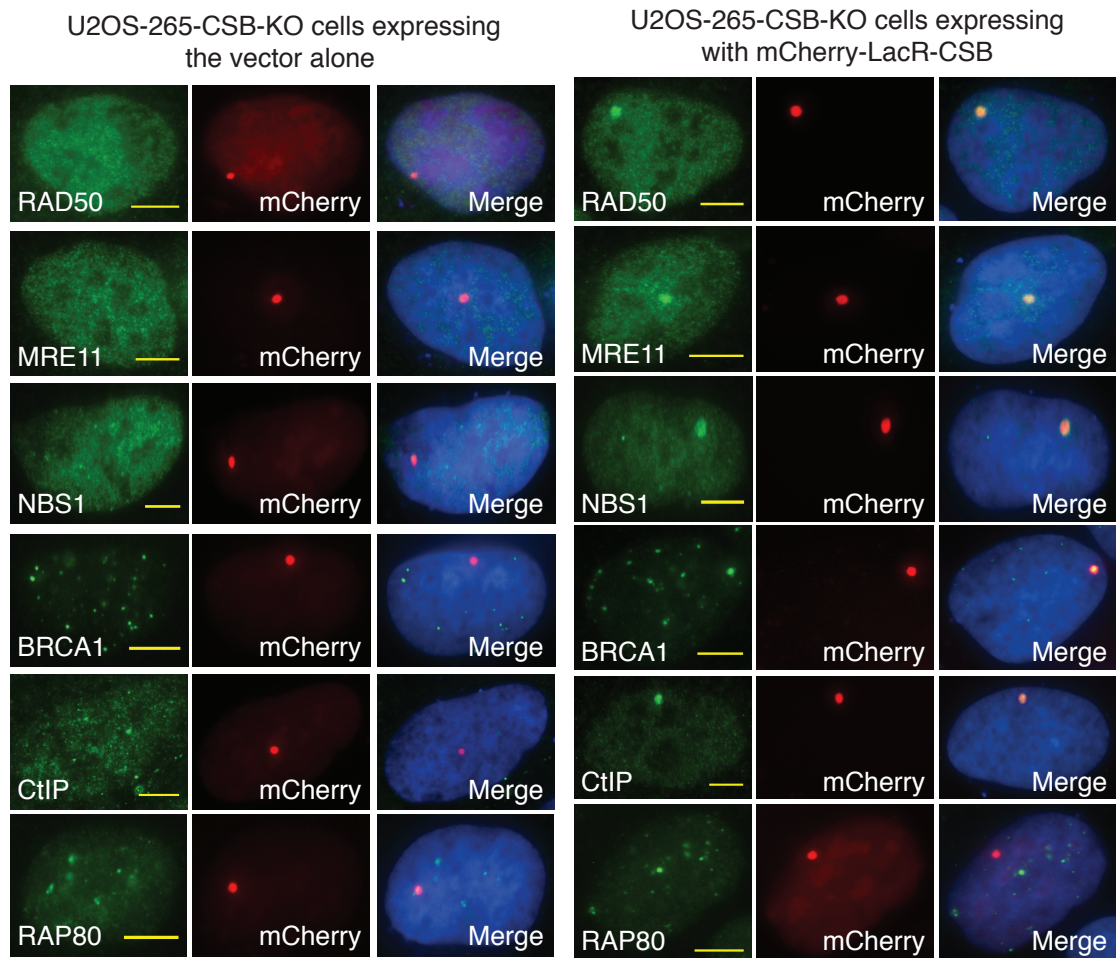**B**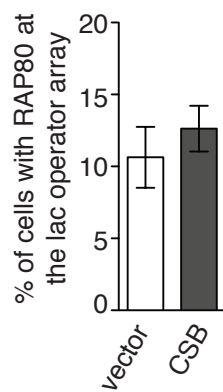**C**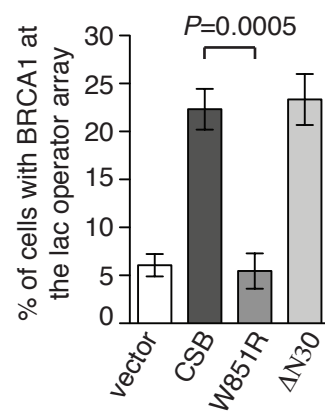

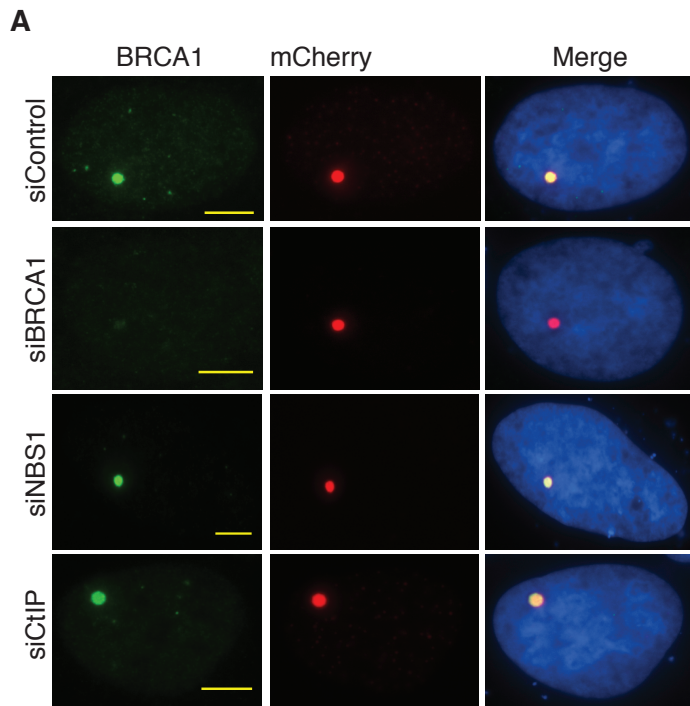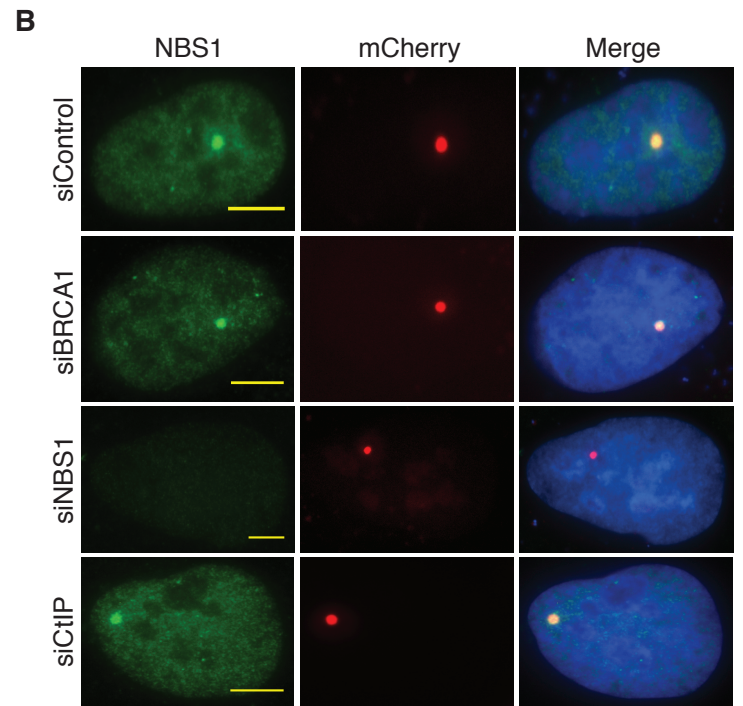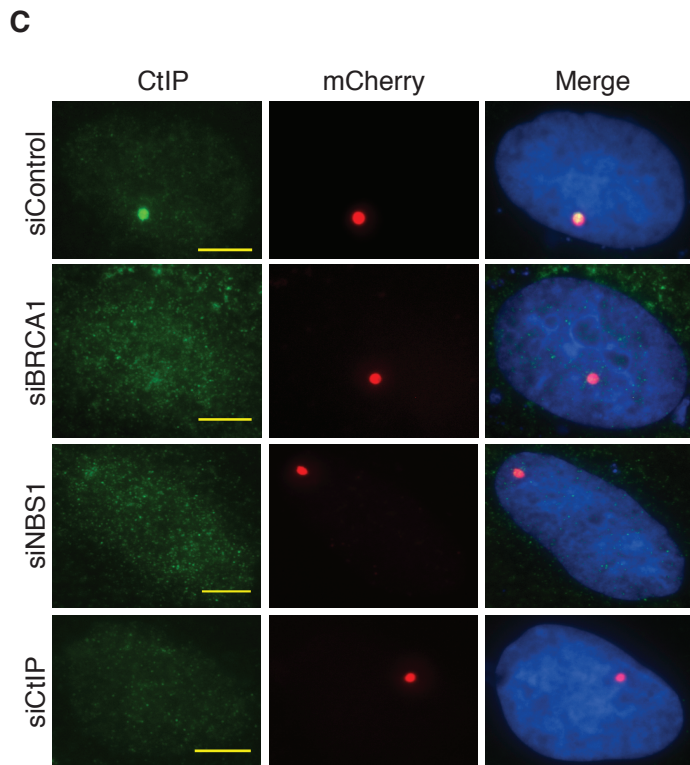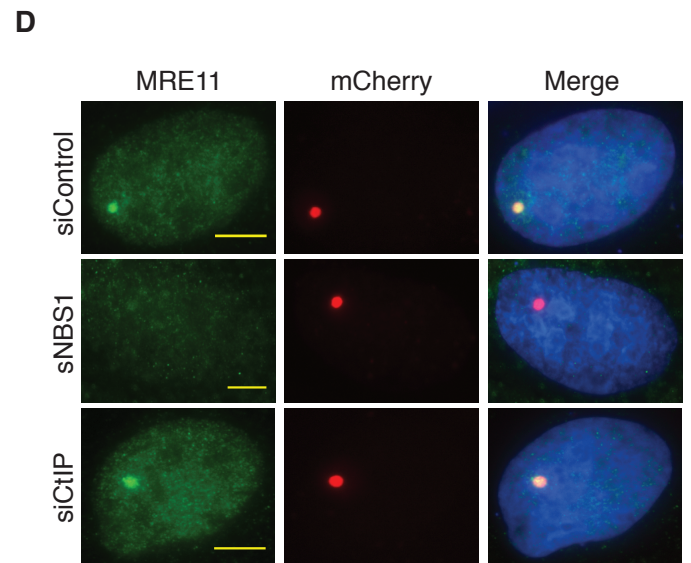

**A**

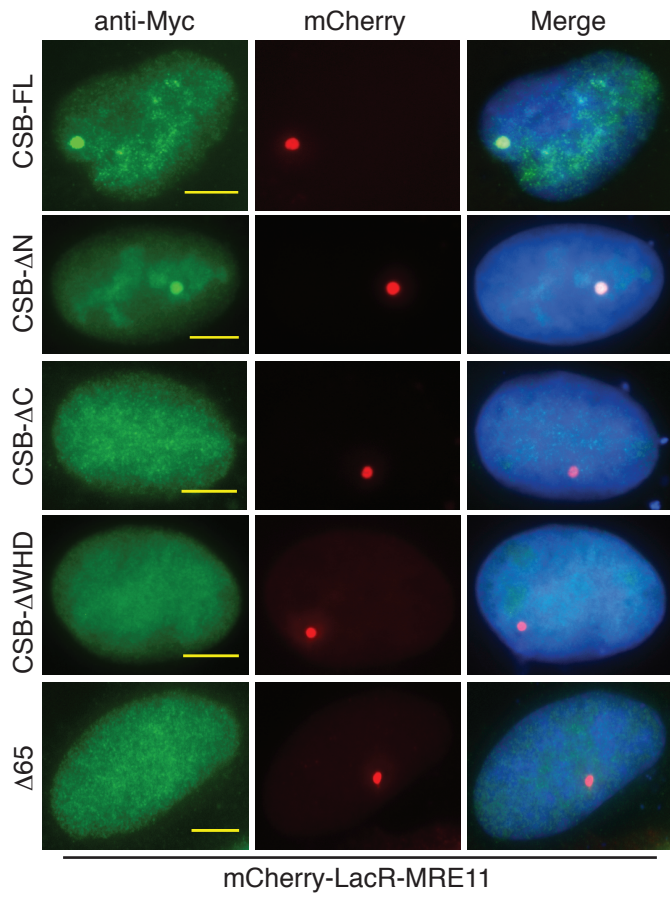

**B**

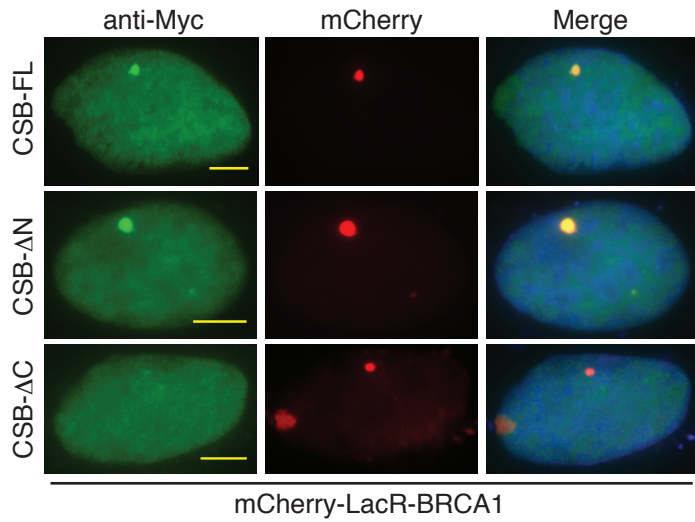

**C**

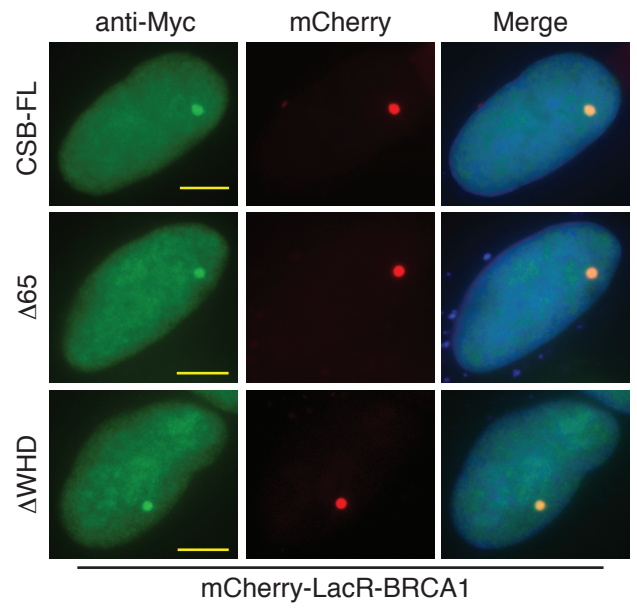

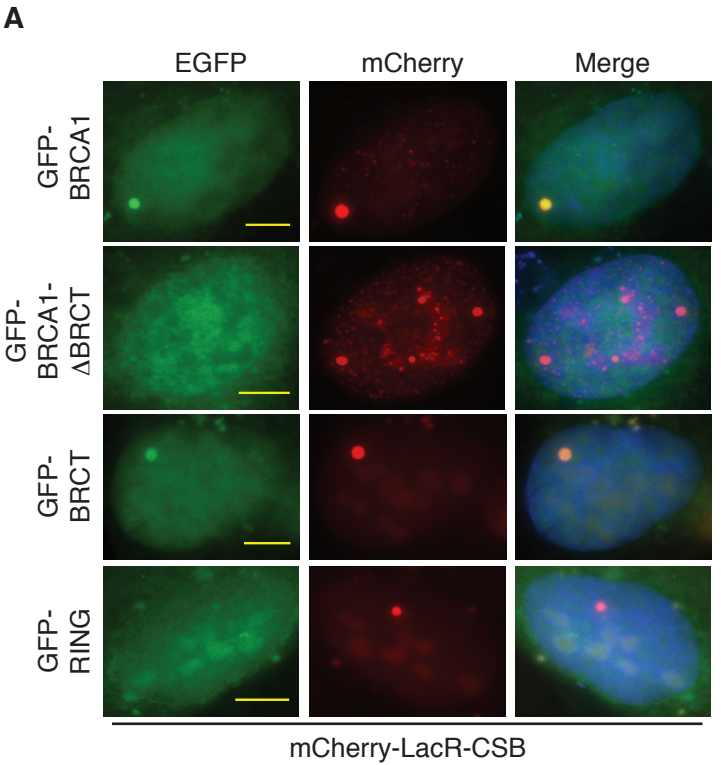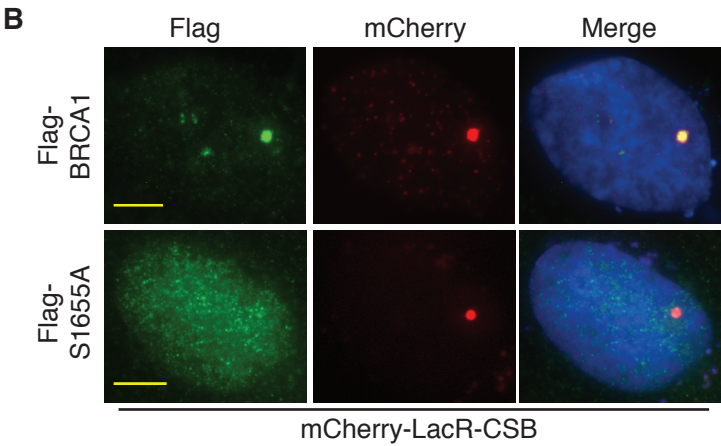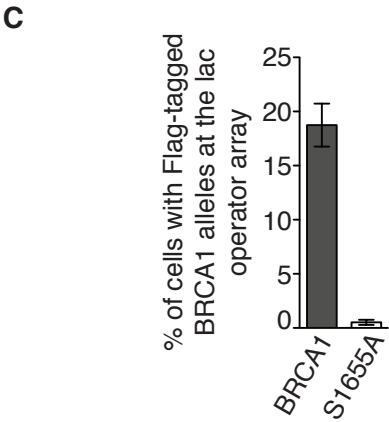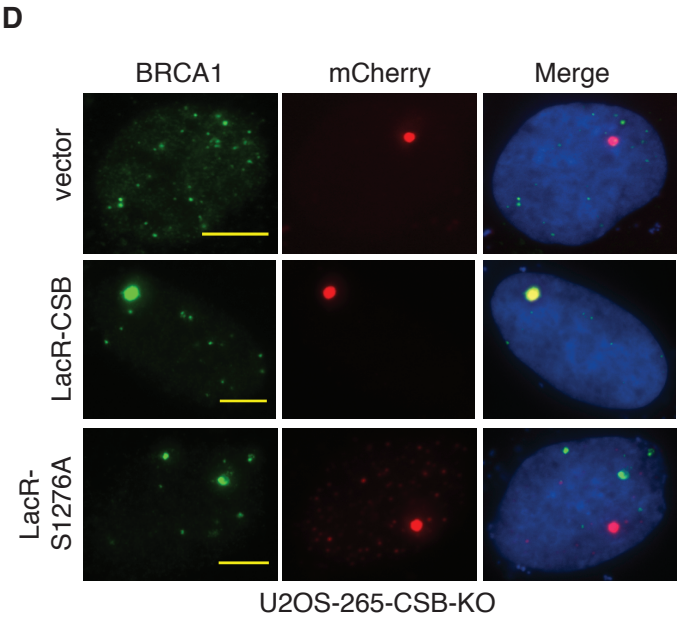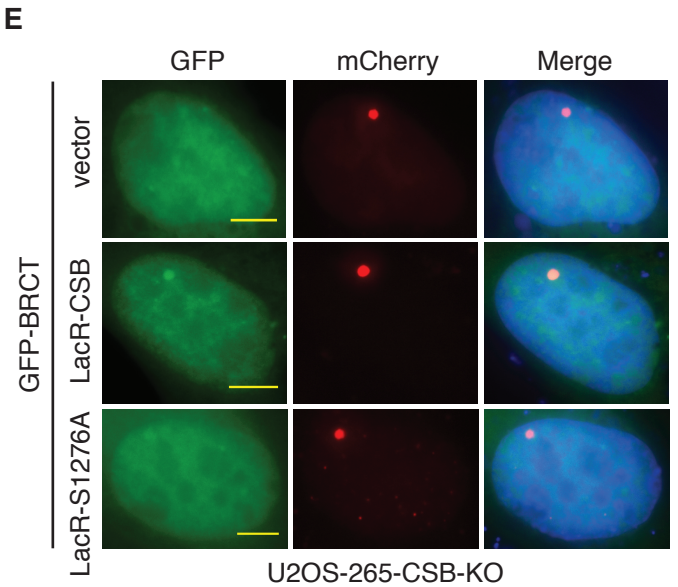

**A**

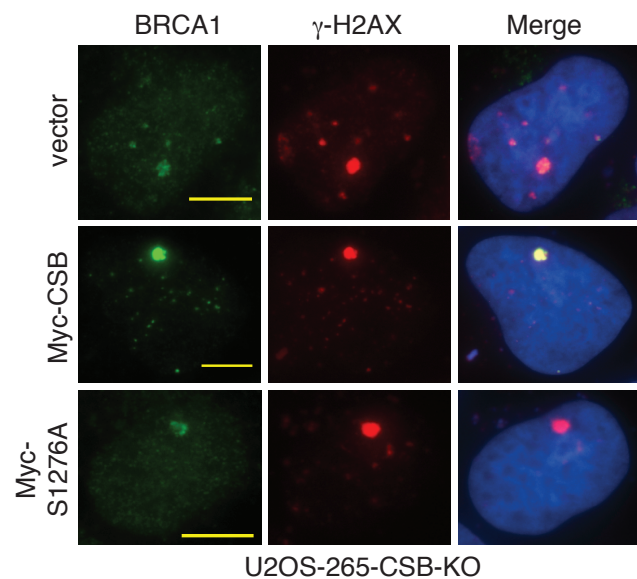

**B**

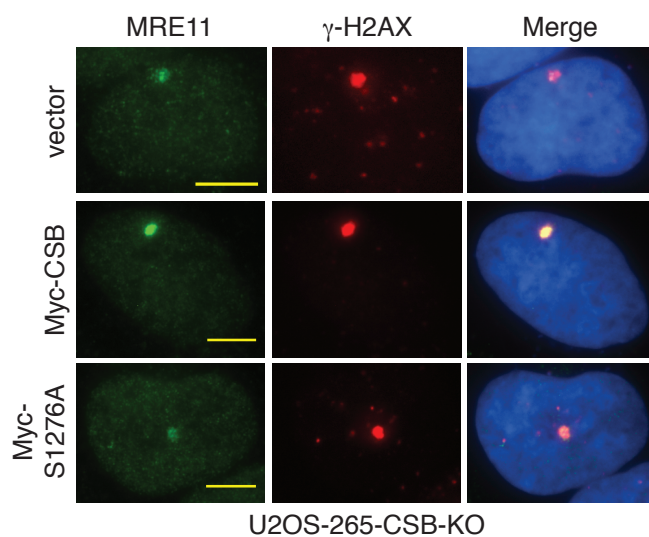

**C**

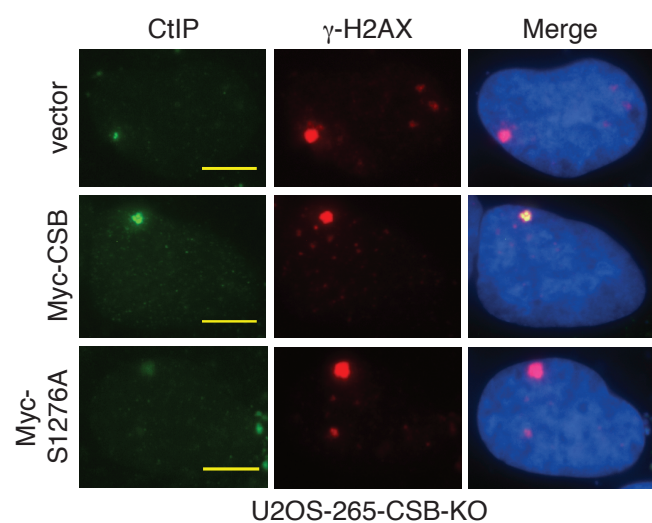

**D**

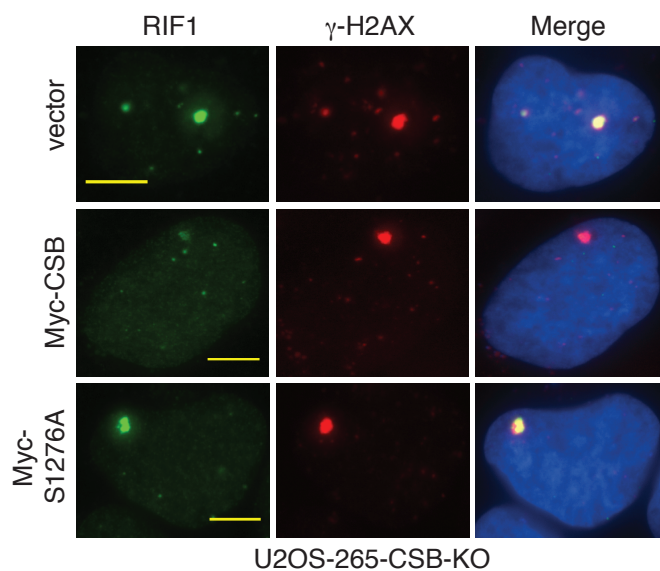

**A**

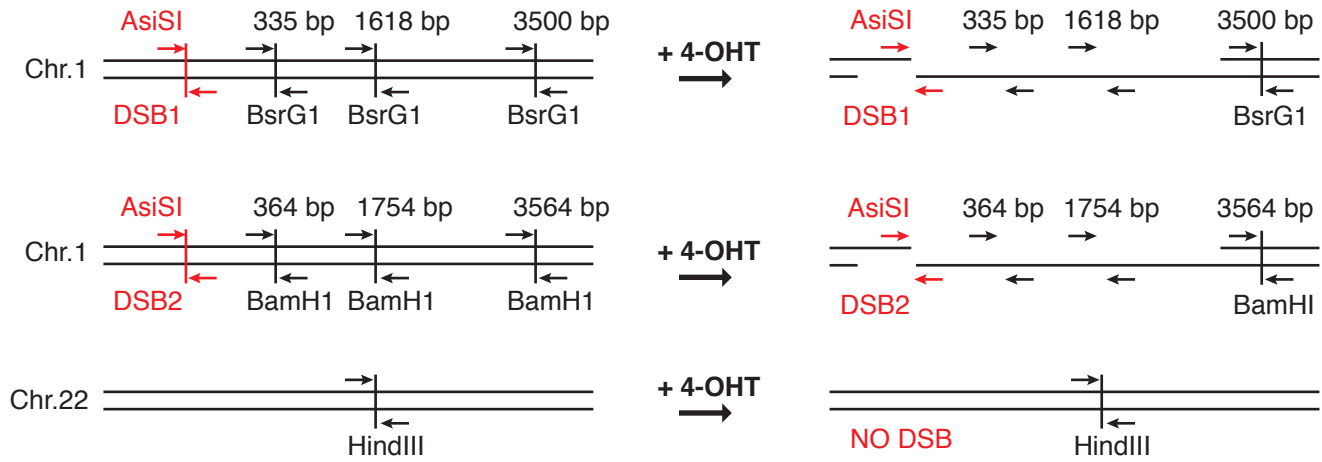

**B**

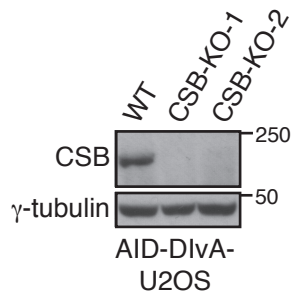

**C**

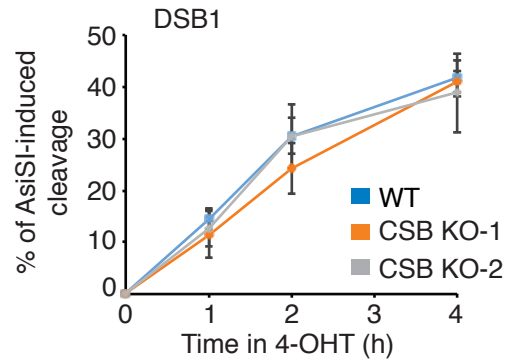

**D**

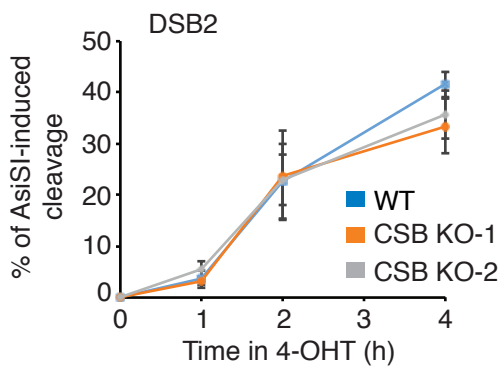

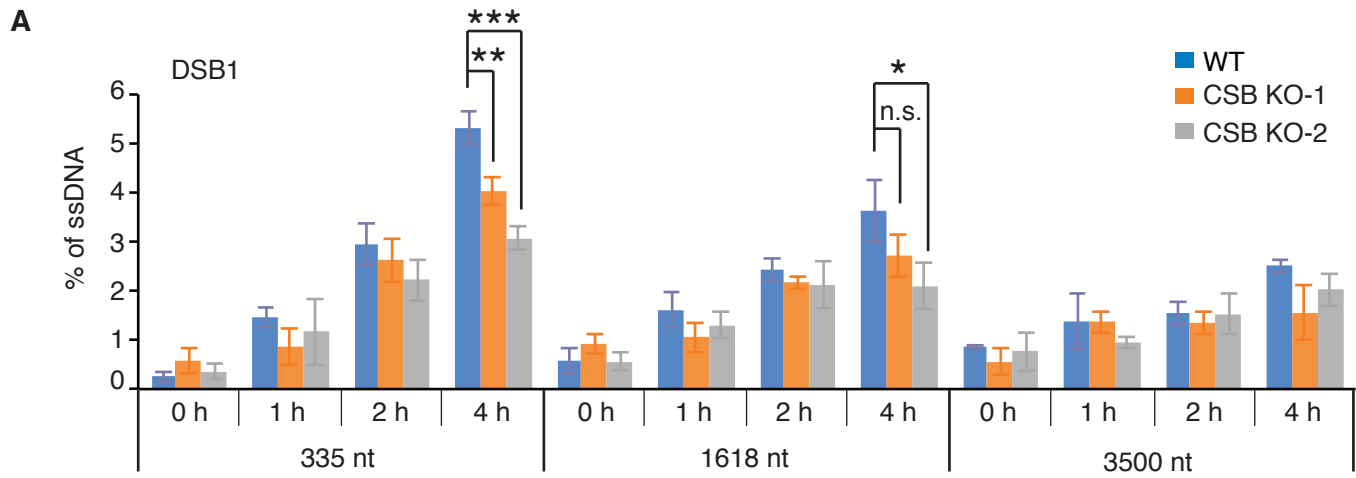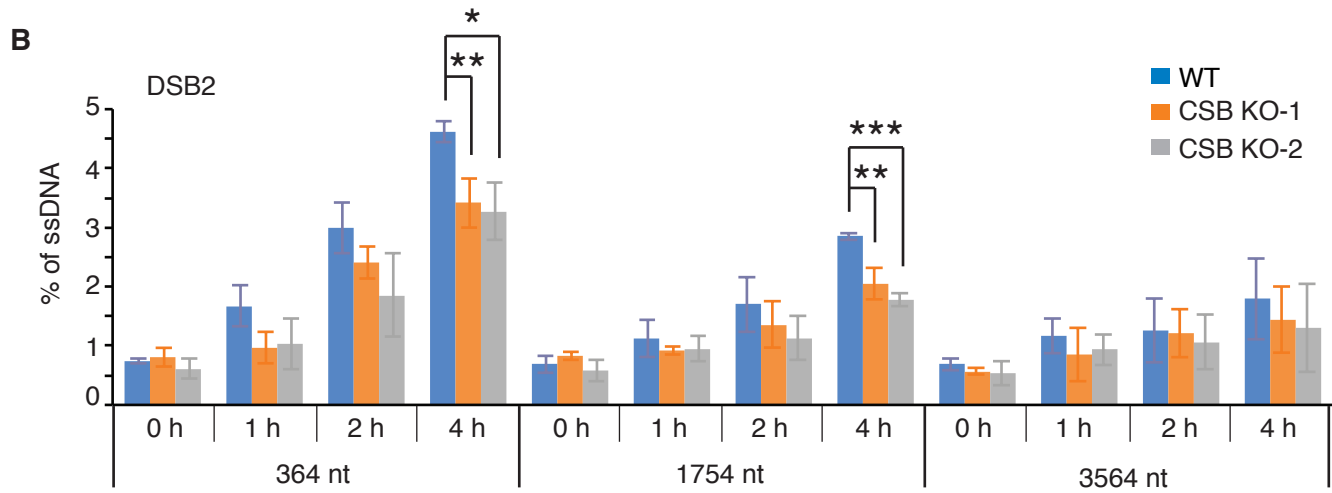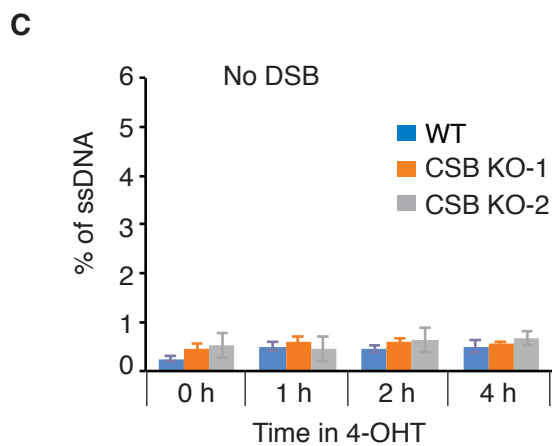

Supplement: gkz784_supplemental_file.pdf [file gkz784_supplemental_file.pdf]
